# Supplementary material for: Savanna elephant numbers are only a quarter of their expected values
Source: PLOS journal article supplement (doi:10.1371/journal.pone.0175942), 2017-04-17
Supplement: S1 (10.1371/journal.pone.0175942.s001) [file journal.pone.0175942.s001]

(listing pending)
